# Supplementary material for: Understanding the cascade heterojunction of CuPc/Bi-MOF for photoelectrochemical nitrate reduction
Source: Royal Society of Chemistry journal article supplement (doi:10.1039/d4cc01551g), 2024-01-01
Supplement: d4cc01551g1.pdf [file d4cc01551g1.pdf]

Support Information

**Understanding Cascade Heterojunction of CuPc/Bi-MOF  
for Photoelectrochemical Nitrate Reduction**

Yajie Bai,<sup>ab†</sup> Zhenyuan Fang,<sup>c†</sup> Meiqi Zhai,<sup>b</sup> Xianlei Jiang,<sup>a</sup> Jianming Li,<sup>\*a</sup> Hongye  
Bai,<sup>\*b</sup> Weiqiang Fan,<sup>\*b</sup>

<sup>a</sup> *College of New Energy, Ningbo University of Technology, Ningbo, 315336, P. R. China.*

<sup>b</sup> *School of Chemistry and Chemical Engineering, Jiangsu University, Zhenjiang, 212013, P. R. China.*

<sup>c</sup> *School of Chemistry, Beihang University, Beijing, 100191, P. R. China*

<sup>†</sup> *These authors contributed equally to this work.*

*\*Emails: fwq4993329@ujs.edu.cn (W. Fan), bhy198412@163.com (H. Bai),  
jmli@nbut.edu.cn (J. Li).*

## Materials

All chemical reagents are of analytical grade and are used without further purification. Copper phthalocyanine (CuPc), Bismuth nitrate pentahydrate ( $\text{Bi}(\text{NO}_3)_3 \cdot 5\text{H}_2\text{O}$ ), 1,3,5-Benzenetricarboxylic acid ( $\text{H}_3\text{BTC}$ ), Potassium nitrate ( $\text{KNO}_3$ ), Ammonium chloride ( $\text{NH}_4\text{Cl}$ ), Sodium nitrite ( $\text{NaNO}_2$ ), sodium sulfite ( $\text{Na}_2\text{SO}_3$ ), nitric acid and sodium potassium tartrate ( $\text{NaKC}_4\text{H}_4\text{O}_6$ ), Nessler's reagent, hydrogen nitrate ( $\text{HNO}_3$ , 65%~68%) were all obtained from Aladdin Reagent Co. The FTO glass substrates used in the experiment were washed by acetone and ethanol for 25 minutes in advance.

## Characterization

The morphology of samples was investigated by transmission electron microscopy (TEM, Tecnai G2 F20 S-Twin electron microscope (FEI Co.)), and scanning electron microscopy (SEM, Hitachi S-4800 25.0kV 7.5mm $\times$ 40.0 SE(U)). The crystal structure was collected by high-resolution transmission electron microscope (HRTEM) and X-ray diffractometer (XRD, Bruker D8 ADVANCE). The valence state and composition of elements were detected by X-ray photoelectron spectroscopy (XPS, Thermos Fisher Scientific, Escalab 250Xi, Al Ka). Fourier-transform infrared spectroscopy (FT-IR) to systematically evaluate the structure and morphology of the CuPc/Bi-MOF material. Electrochemical impedance spectroscopy (EIS) and Mott-Schottky data were tested by electrochemical instrumentation (Princeton, VersaSTAT 3). The absorption spectra were tested by UV-Vis 2550 (Shimadzu, Japan). All photoelectrochemical tests were carried out on the

electrochemical system (CHI-614, China).

## **Preparation**

CuPc was prepared by vacuum evaporation method as follows: The cleaned FTO was fixed to the top of the vacuum evaporation system, and 0.2 g of CuPc powder was added to the metal evaporation crucible. Open the vacuum pump, reduce the vacuum degree of the system to  $10^{-3}$  Pa, and start the heating system to keep the FTO rotating evenly. After heating for 5 min, a uniform film of blue CuPc was successfully formed on the FTO surface.

CuPc/Bi-MOF was prepared by chemical bath deposition using CuPc as the substrate material, detailed as follows: First, the prepared CuPc samples were soaked with solutions containing 20 mmol  $\text{Bi}(\text{NO}_3)_3 \cdot 5\text{H}_2\text{O}$  for 5, 10, 15, 20, 25 min to deposit Bi-MOF layers of different thicknesses. Subsequently, the samples were transferred to an ethanol solution to remove excess water. Next, the sample was again dipped into a solution containing 20 mmol H3BTC for the same time. This step ensures that the Bi-MOF layer is successfully deposited on the CuPc surface. Finally, the CuPc/Bi-MOF was obtained as the final MOF cathode.

## **PEC Measurements**

All photoelectrochemical testing was conducted in a 0.1 M phosphate buffer solution (PBS) using a three-electrode system with CuPc/Bi-MOF as the working electrode, Ag/AgCl as the reference electrode, and a Pt foil as the counter electrode, under simulated sunlight illumination provided by a  $100 \text{ mW cm}^{-2}$  xenon lamp in a sealed H-cell (Scheme S2). Measurements were taken using linear sweep

voltammetry and cyclic voltammetry techniques in PBS containing  $150 \mu\text{g mL}^{-1}$   $\text{KNO}_3$  and  $150 \mu\text{g mL}^{-1}$   $\text{KCl}$ , with Mott-Schottky plots generated at 500 and 800 Hz frequencies for both CuPc and CuPc/Bi-MOF.

### **The determination of $\text{NH}_3\text{-N}$**

First, the  $\text{NH}_4\text{Cl}$  crystals were dried overnight at  $105\text{-}110^\circ\text{C}$  to prepare 50 mL  $\text{NH}_4\text{Cl}$  solutions at different concentrations (0.0, 0.2, 0.4, 0.6, 0.8,  $1.0 \mu\text{g mL}^{-1}$ ). Next, add 1 mL  $\text{NaKC}_4\text{H}_4\text{O}_6$  ( $500 \text{ g L}^{-1}$ ) and 1 mL of Nessler's reagent to each solution and leave to stand for about 20 min. Absorbance was measured at 425 nm by a UV-vis spectrophotometer to establish a relationship between absorbance and  $\text{NH}_3\text{-N}$  concentration. The results showed a good linear relationship between the absorbance and the  $\text{NH}_3\text{-N}$  concentration ( $y = 0.1751x + 0.00564$ ,  $R^2 = 0.9999$ ) (Fig. S12 and S13). The concentration of  $\text{NH}_3\text{-N}$  in the reaction solution was determined by the same method to calculate the  $\text{NH}_3$  yield:

$$V_{\text{NH}_3} = (C_{\text{NH}_3} \times V) / (T \times S)$$

Among them,  $C_{\text{NH}_3}$  represents the measured  $\text{NH}_3$  concentration,  $V$  is the reaction liquid product,  $S$  is the cathode area, and  $T$  is the reaction time.

### **Determination of $\text{NO}_2^-\text{-N}$**

For the determination of  $\text{NO}_2^-\text{-N}$  concentration, a Griess chromoagent was first prepared: 0.2 g of N-(1-naphthalyl) diethyldiamine hydrochloride, 4 g of p-aminophenylsulfonamide and 10 mL of phosphoric acid ( $\rho = 1.70 \text{ g mL}^{-1}$ ) were mixed in 50 mL of deionized water. 0.1 mL of chromogen was mixed with 5 mL of  $\text{NO}_2^-\text{-N}$  solution (0.00, 0.02, 0.04, 0.06, 0.10,  $0.20 \mu\text{g mL}^{-1}$ ;  $\text{NaNO}_2$  crystals were

dried at 105-110 °C for 2 h before use) and left for 20 min, the absorbance was measured at 540 nm. Show a good linear relationship between the obtained absorbance and the NO<sub>2</sub><sup>-</sup>-N concentration ( $y = 0.7850x - 0.0058$ ,  $R^2 = 0.9998$ ) (Fig. S14 and S15). The amount of NO<sub>2</sub><sup>-</sup>-N in the reaction solution was determined by the same method.

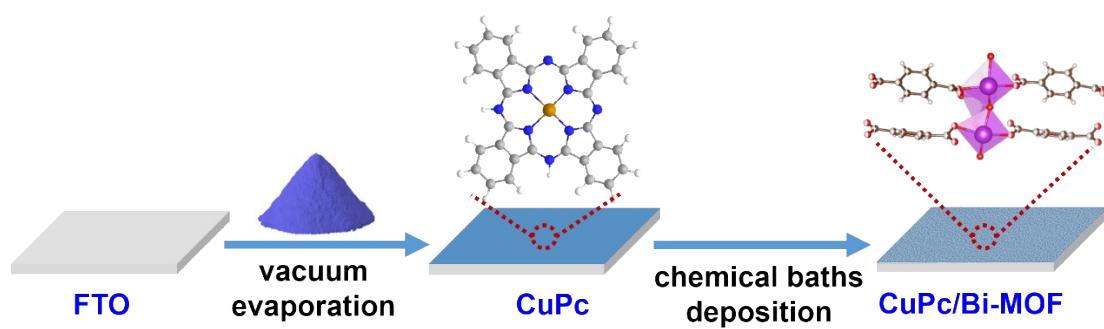

**Scheme S1** Schematic illustration of the synthesis process of CuPc/Bi-MOF.

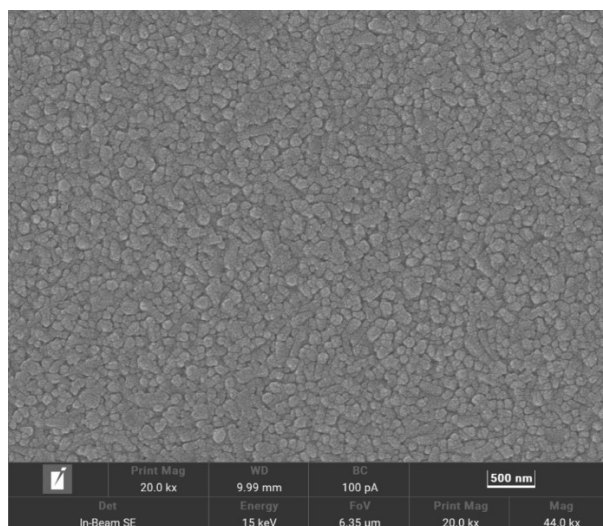

**Fig. S1** SEM image of CuPc.

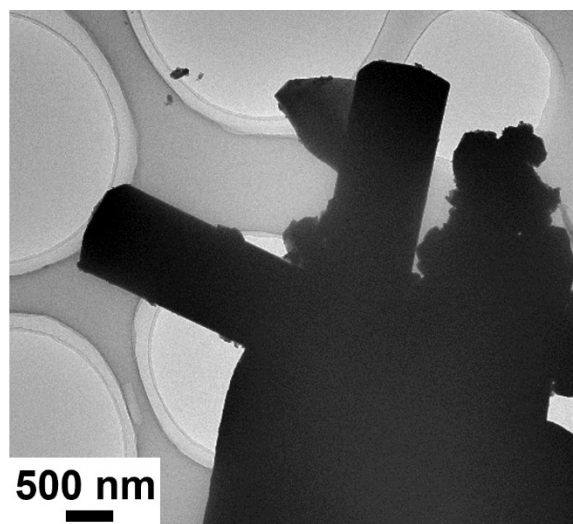

**Fig. S2** TEM image of CuPc/Bi-MOF.

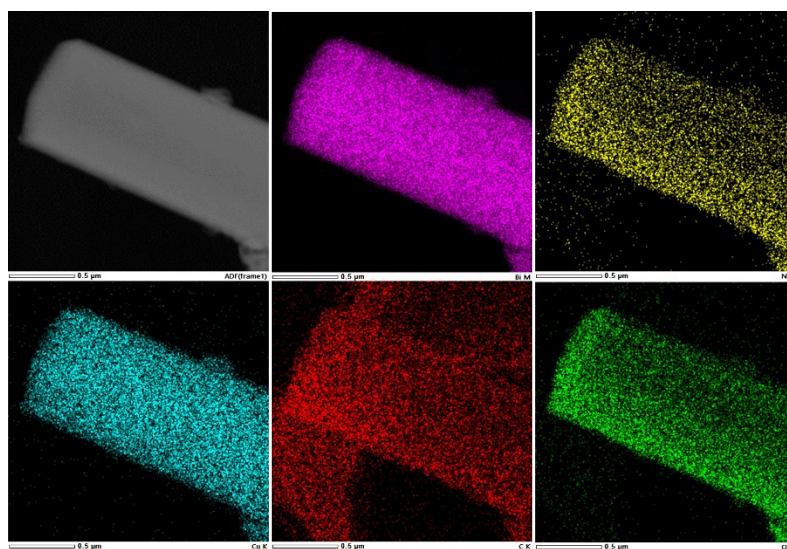

**Fig. S3** Elemental mapping images of CuPc/Bi-MOF.

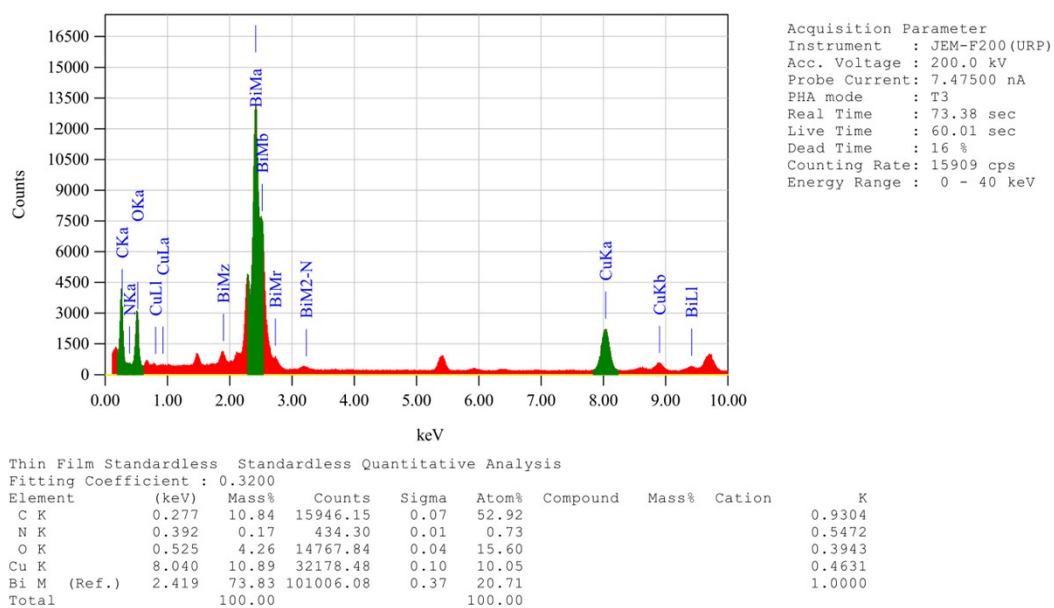

**Fig. S4** Quantitative analysis images of CuPc/Bi-MOF.

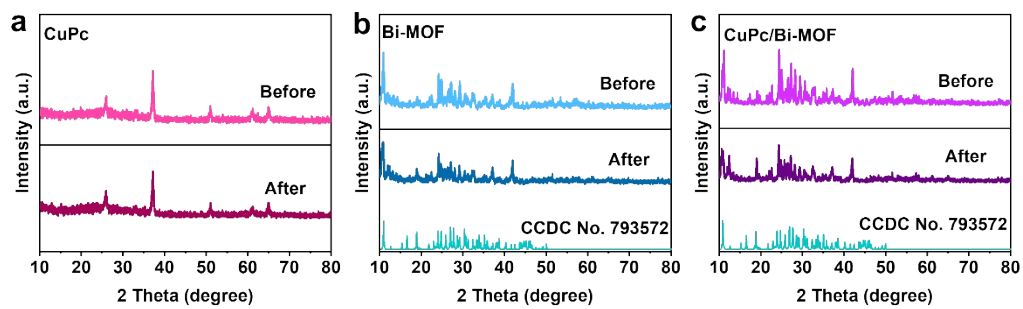

**Fig. S5** XRD patterns before and after measurements.

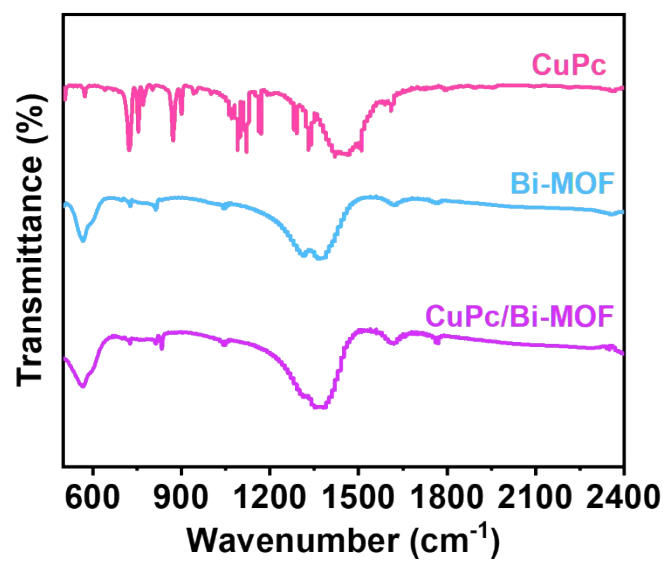

**Fig. S6** FTIR images of CuPc, Bi-MOF and CuPc/Bi-MOF.

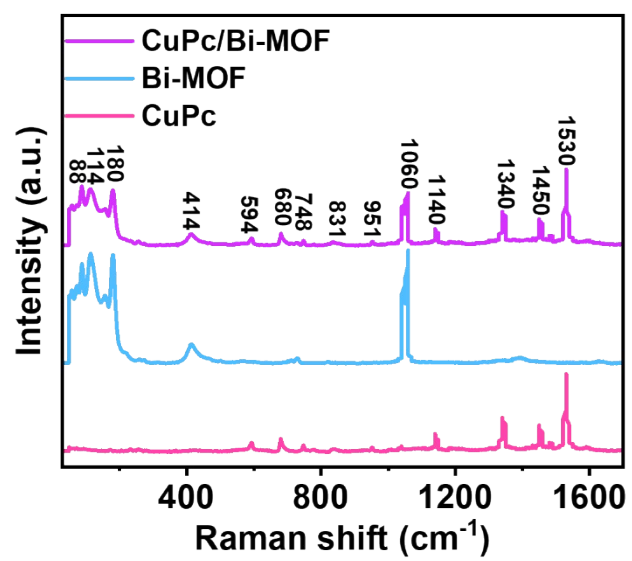

**Fig. S7** Raman images of CuPc, Bi-MOF and CuPc/Bi-MOF.

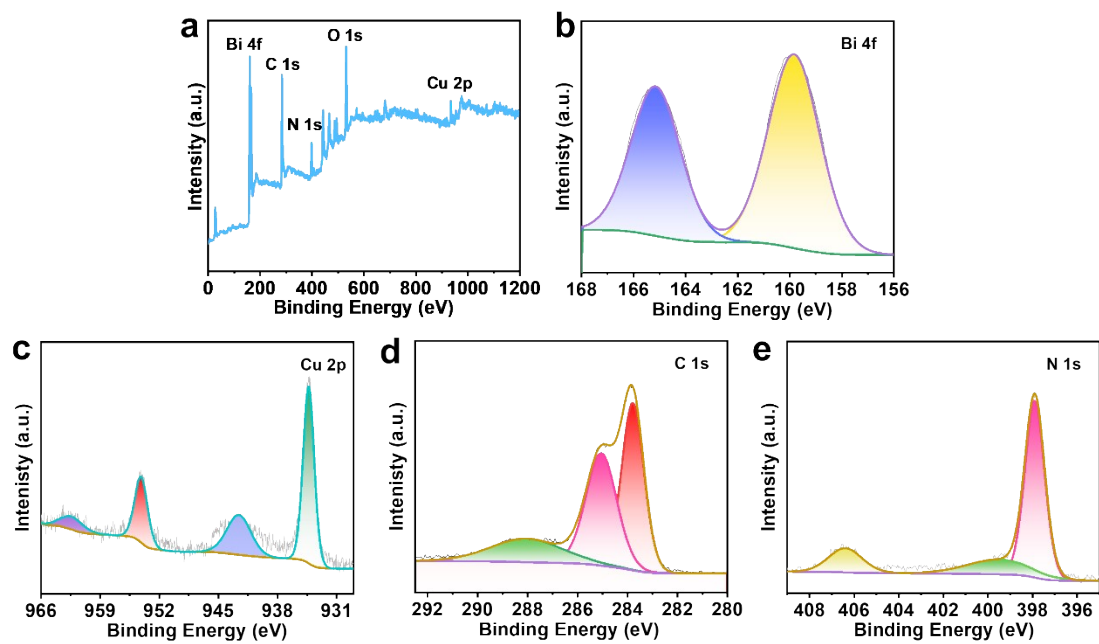

**Fig. S8** High-resolution XPS spectra of CuPc/Bi-MOF: (a) full spectrum, (b) Bi 4f, (c) Cu 2p, (d) C 1s, (e) N 1s.

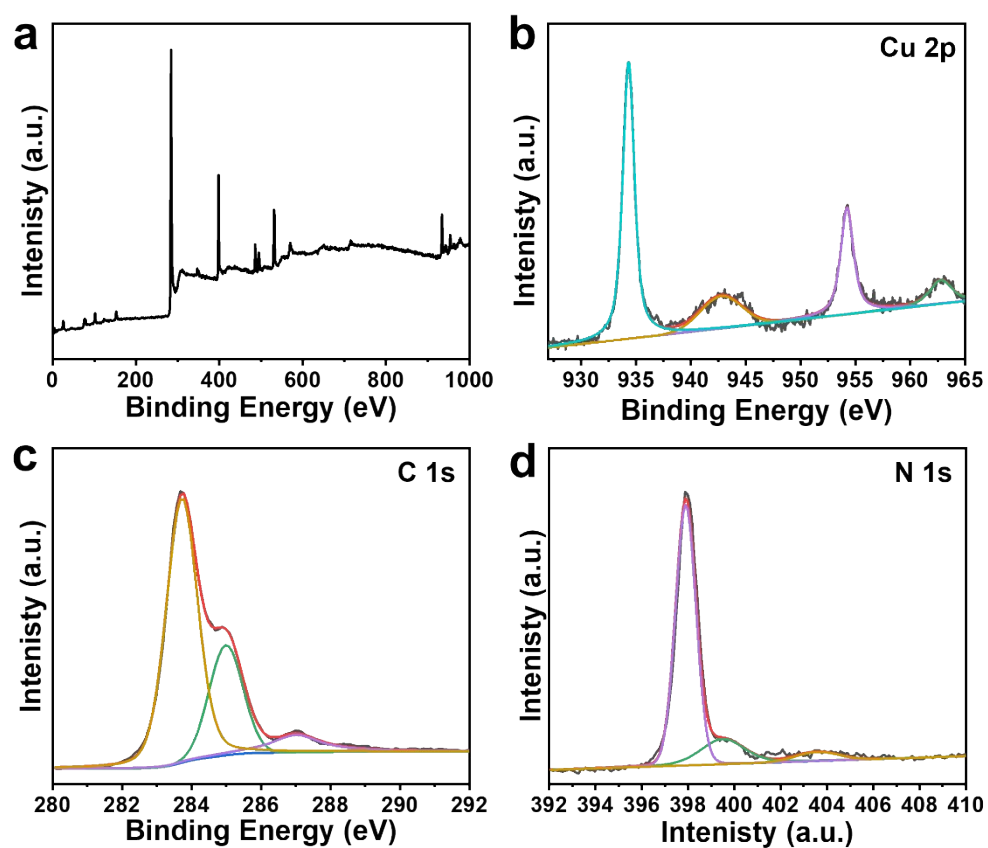

**Fig. S9** High-resolution XPS spectra of CuPc: (a) full spectrum, (b) Cu2p XPS spectra, (c) C1s XPS spectra, (d) N1s XPS spectra.

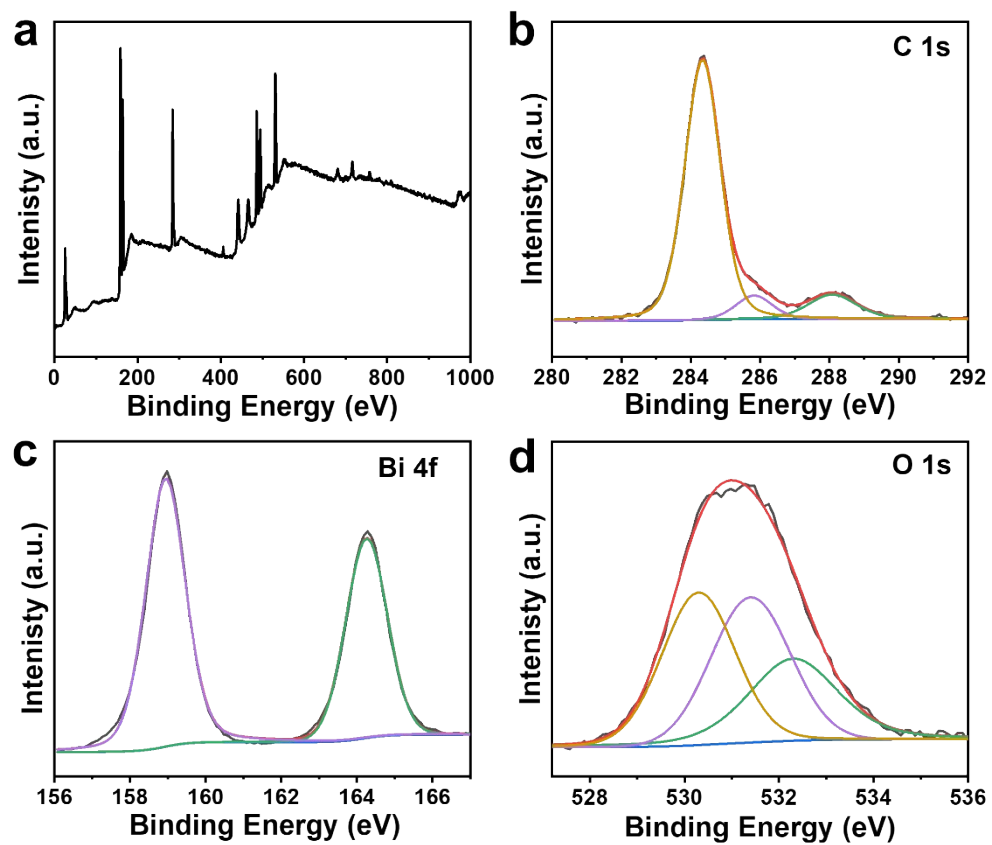

**Fig. S10** High-resolution XPS spectra of Bi-MOF: (a) full spectrum, (b) C 1s XPS spectra, (c) Bi 4f XPS spectra, (d) O 1s XPS spectra.

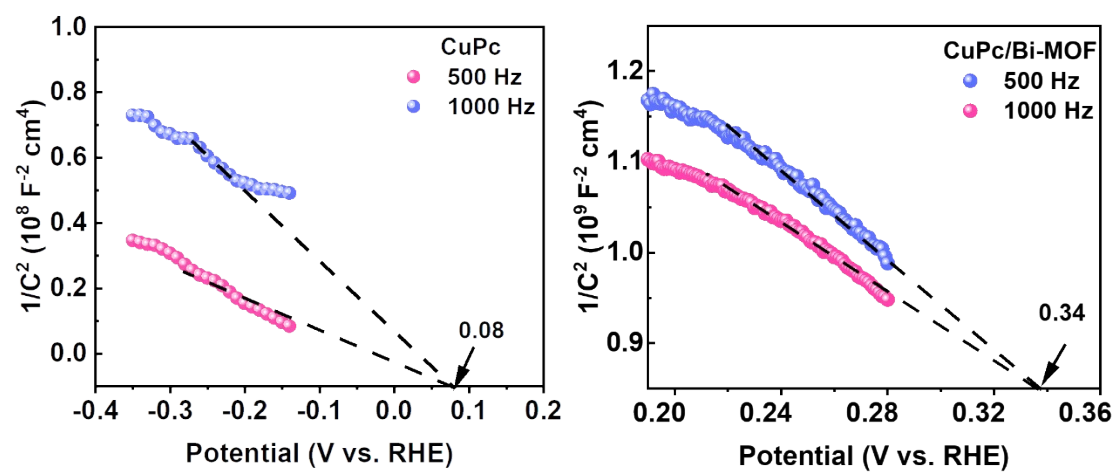

Fig. S11 Mott-Schottky plots of CuPc and CuPc/Bi-MOF.

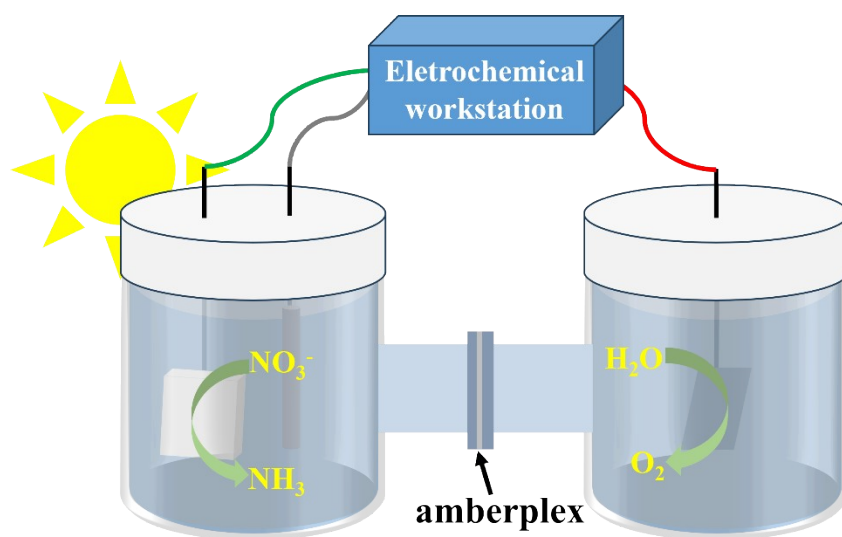

**Scheme S2** The schematic diagram for PEC NITRR configuration.

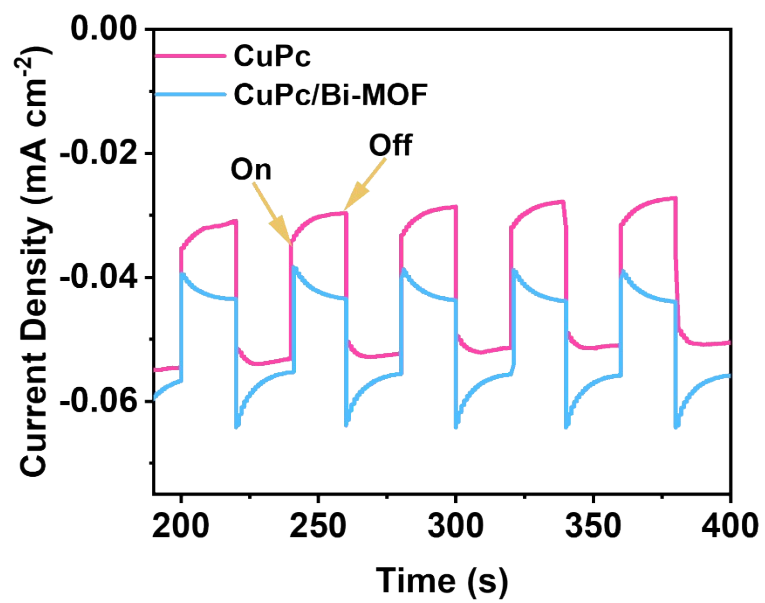

**Fig. S12** I-t curves under cyclic switching illumination of CuPc and CuPc/Bi-MOF.

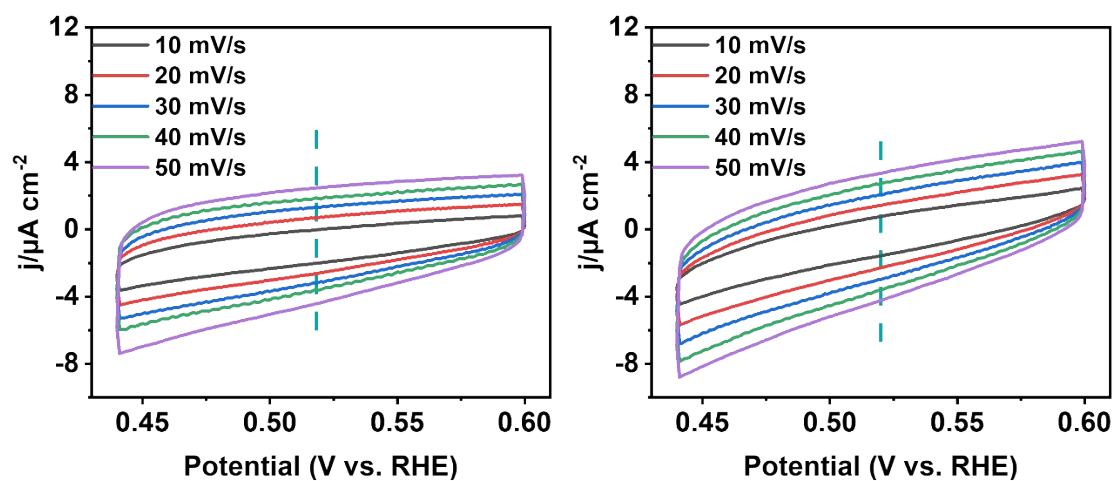

**Fig. S13** Cyclic voltammetry measurements with different scanning rates of CuPc and CuPc/Bi-MOF.

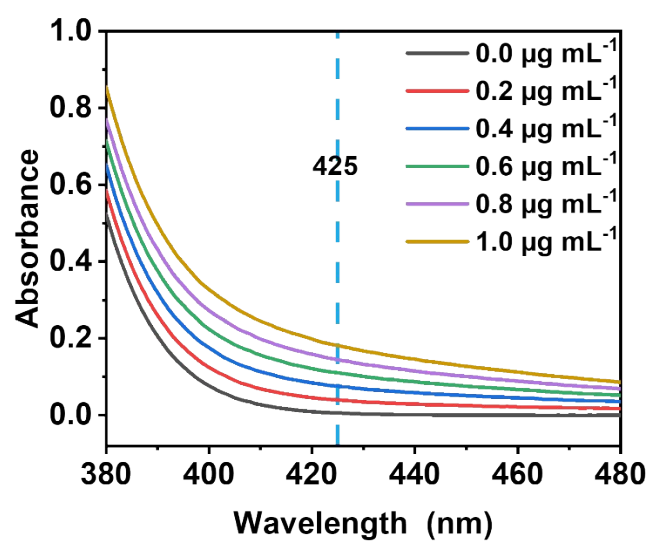

**Figure S14.** Standard absorbance curve of  $\text{NH}_3$  yield by Nessler reagent spectrophotometry.

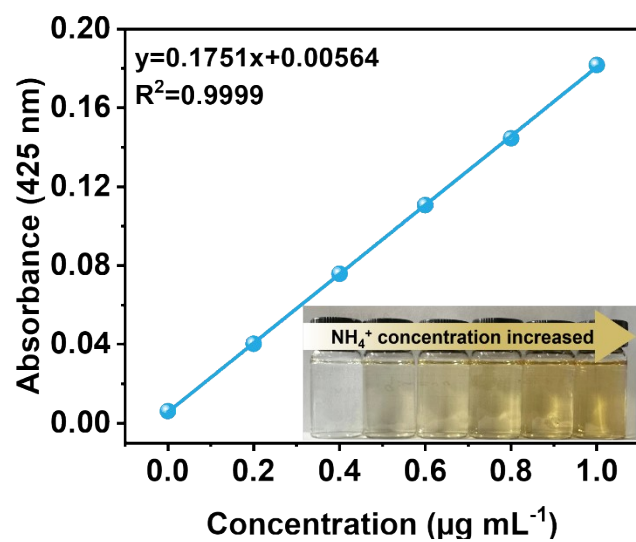

**Figure S15.** Calibration curve of  $\text{NH}_3$  yield by Nessler reagent spectrophotometry.

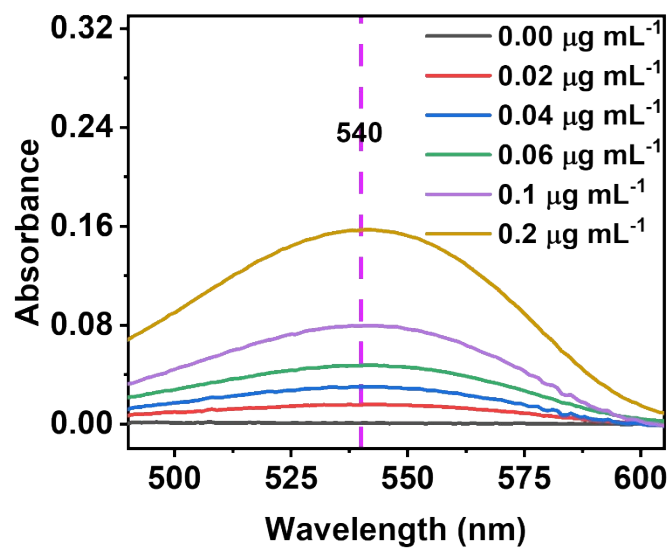

**Figure S16.** Standard absorbance curve of  $\text{NO}_2^-$  yield by Griess reagent spectrophotometry method.

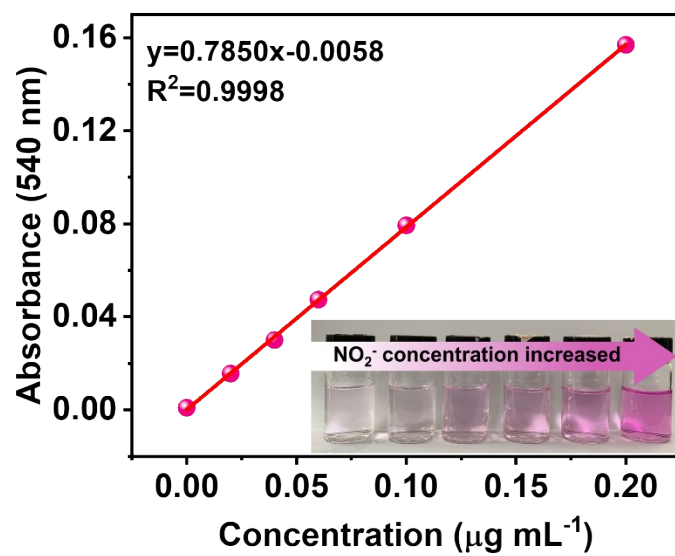

**Figure S17.** Standard absorbance curve of  $\text{NH}_3$  yield by Nessler reagent spectrophotometry.

| Catalyst                          | Yield ( $\mu\text{g h}^{-1} \text{ cm}^{-2}$ ) | Ref.             |
|-----------------------------------|------------------------------------------------|------------------|
| Pt                                | 0.191                                          | [S1]             |
| $\text{Fe}_3\text{O}_4/\text{Ti}$ | 2.0                                            | [S2]             |
| Ag nanosheet                      | 2.8                                            | [S3]             |
| Bi-doped $\text{CeO}_2$           | 6.3                                            | [S4]             |
| MoO                               | 6.8                                            | [S5]             |
| NiO/CuPc                          | 7.13                                           | <b>This work</b> |

**Table S1.** All data about  $\text{NH}_3$  yield rate have been unified as “ $\mu\text{g h}^{-1} \text{ cm}^{-2}$ ” for comparison.

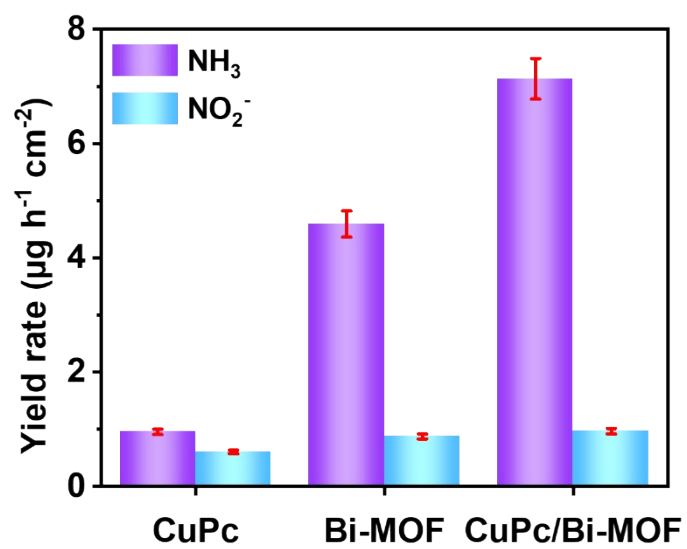

**Fig. S18**  $\text{NH}_3$  and  $\text{NO}_2^-$  yield rate of CuPc, Bi-MOF and CuPc/Bi-MOF at 0 V vs. RHE.

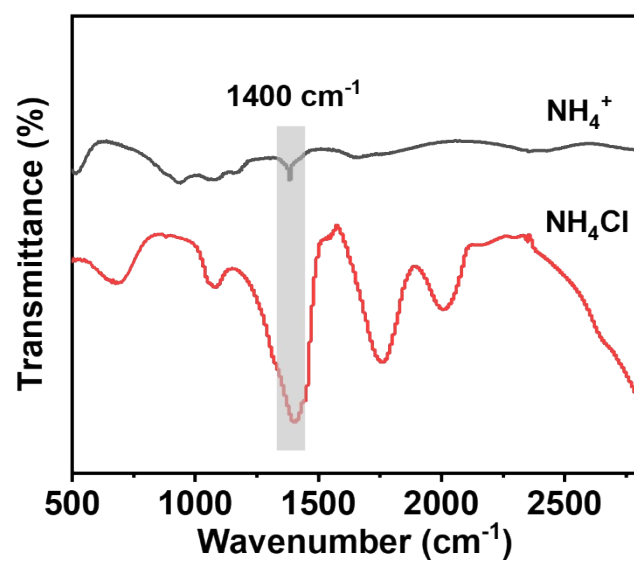

**Fig. S19** FTIR test after 12 h of reaction.

- [S1] B. Sheets, G. Bott, *ChemComm*. 2018, **54**, 4250–4253.
- [S2] Q. Liu, X. Zhang, B. Zhang, Y. Luo, G. Cui, F. Xie, A. Asiri, X. Sun, *Nanoscale*, 2018, **10**, 14396–14389.
- [S3] H. Huang, X. Li, X. Shi, A. Asiri, *Chem. Commun.* 2018, **54**, 11427–11430.
- [S4] Y. Liu, C. Li, L. Guan, K. Li, Y. Lin, *J. Phys. Chem. C* 2020, **124**, 18003–18009.
- [S5] X. Qu, L. Shen, Y. Mao, J. Lin, Y. Li, G. Li, Y. Zhang. G. Li, Y. Zhang, Y. Jiang, S. Sun, *ACS Appl. Mater. Interfaces* 2019, **11**, 31869–31877.
